# Supplementary material for: A new biphenol-dipicolylamine based ligand and its dinuclear Zn2+ complex as fluorescent sensors for ibuprofen and ketoprofen in aqueous solution
Source: Royal Society of Chemistry journal article supplement (doi:10.1039/d4dt00935e), 2024-01-01
Supplement: d4dt00935e1.pdf [file d4dt00935e1.pdf]

## Electronic Supplementary Information

A new biphenol-dipicolylamine based ligand and its dinuclear  $Zn^{2+}$  complex as fluorescent sensors for ibuprofen and ketoprofen in aqueous solution

### List of Contents

1. Synthesis of the ligand
2. Solid state structure of the ligand
3. Acid-base properties of the ligand
4.  $Zn^{2+}$ -binding properties
5. DFT-calculations

## 1. Synthesis of the ligand

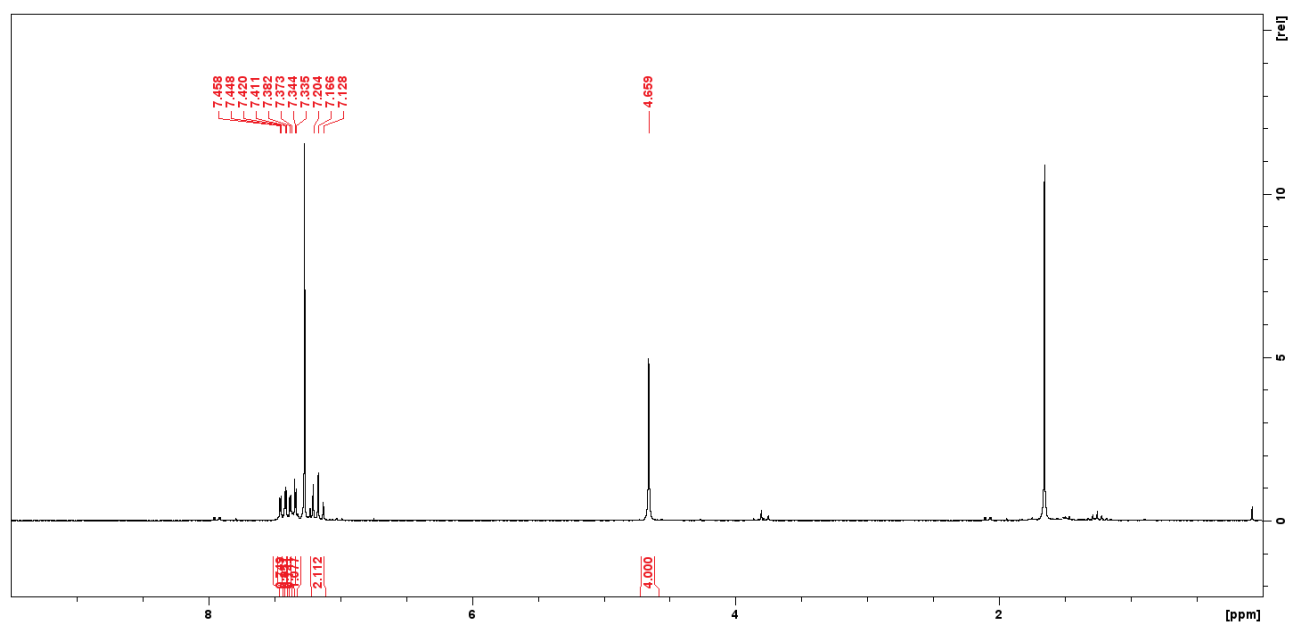

Figure S1. <sup>1</sup>H NMR spectrum of **2** in CDCl<sub>3</sub> at 25 °C.

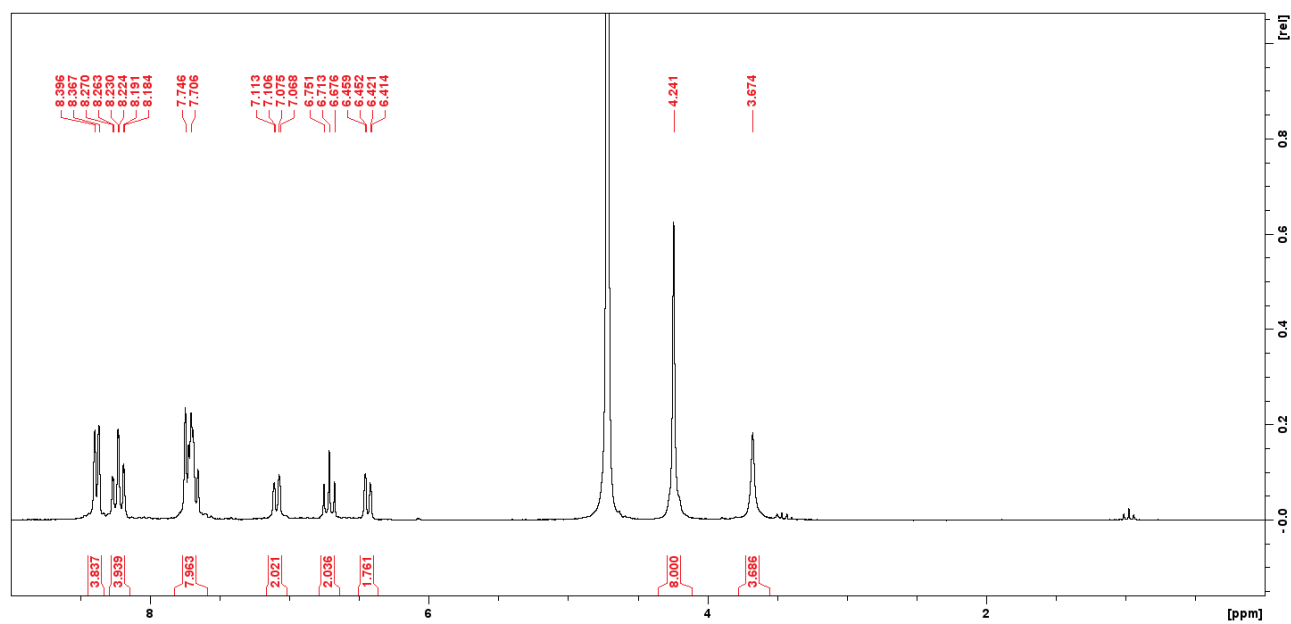

Figure S2. <sup>1</sup>H NMR spectrum of **L** in D<sub>2</sub>O at 25 °C.

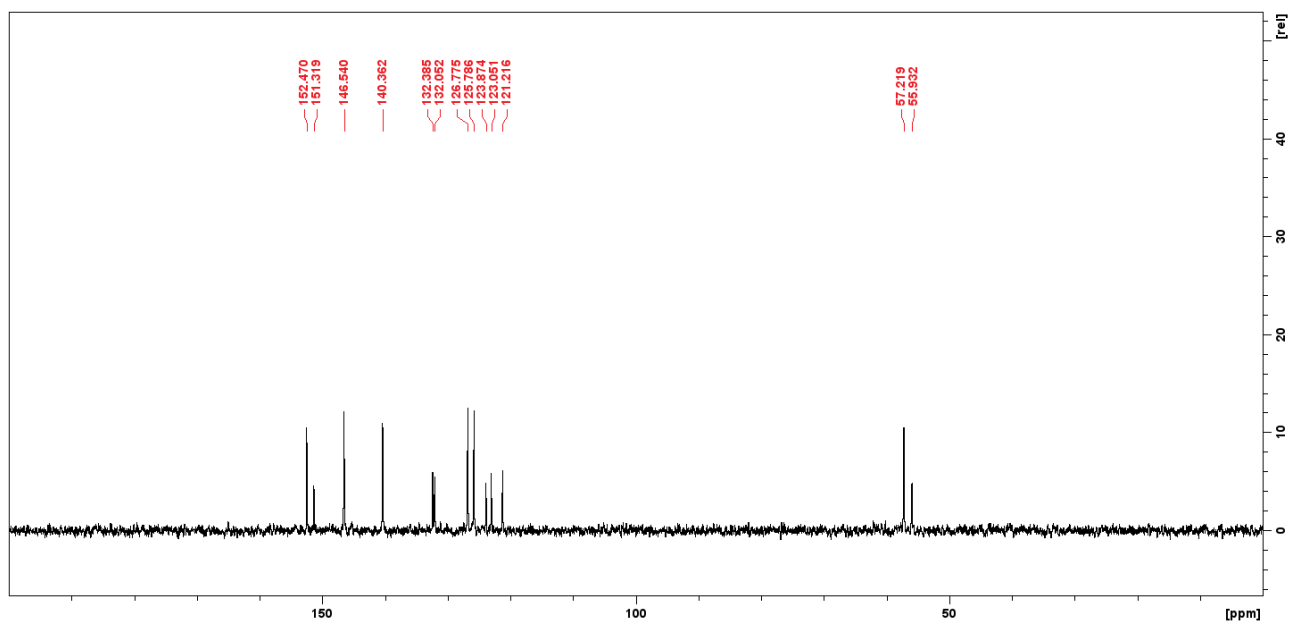

**Figure S3.**  $^{13}\text{C}$  NMR spectrum of L in  $\text{D}_2\text{O}$  at  $25\text{ }^\circ\text{C}$ .

## 2. Solid state structure of the ligand

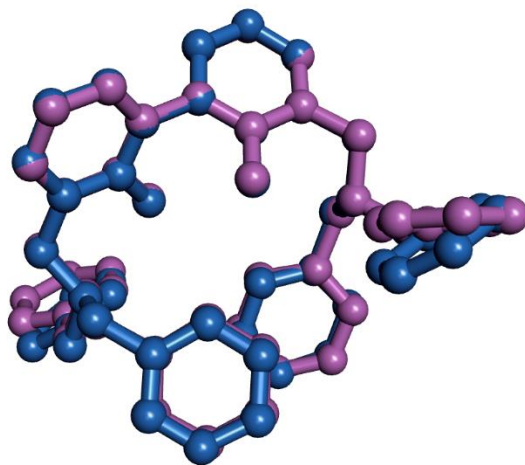

**Figure S4.** Superimposition of the two independent molecules of L.

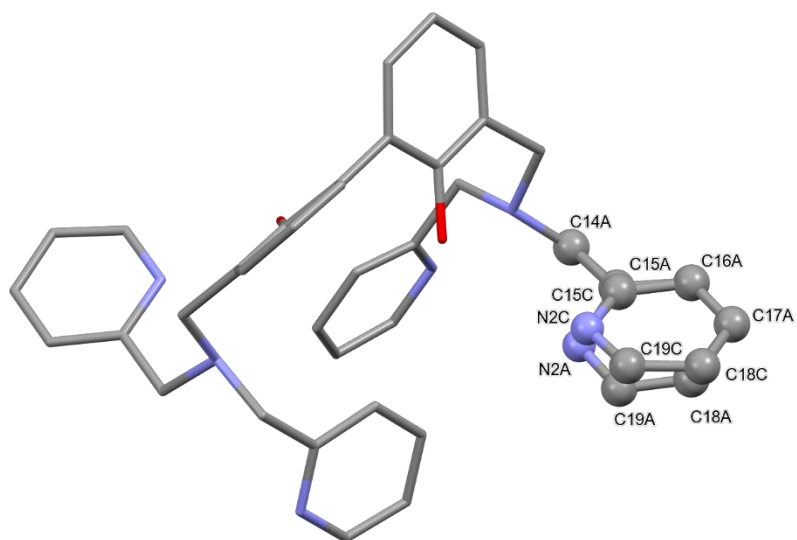

**Figure S5.** Disordered **L** molecule in the asymmetric unit. Hydrogen atoms have been omitted for the sake of clarity.

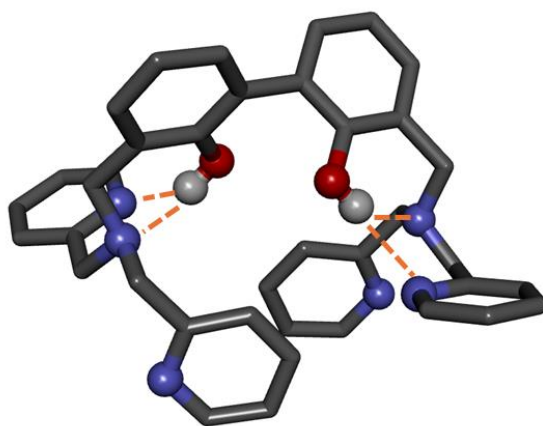

**Figure S6.** Bifurcated H-bond in **L** (independent molecule B).

**Table S1.** Crystallographic data and refinement parameters of **L**.

|                                   |                                                                   |
|-----------------------------------|-------------------------------------------------------------------|
| empirical formula                 | C <sub>38</sub> H <sub>36</sub> O <sub>2</sub> N <sub>6</sub>     |
| formula weight                    | 608.73                                                            |
| T (K)                             | 100                                                               |
| Crystal system, space group       | Monoclinic, P2/c                                                  |
| Unit cell dimensions (Å, °)       | a = 21.2572(5)<br>b = 14.9463(4), β = 90.088(2)<br>c = 20.1478(5) |
| V (Å <sup>3</sup> )               | 6401.3(3)                                                         |
| Z, dcalc(g/cm <sup>3</sup> )      | 8, 1.263                                                          |
| μ (mm <sup>-1</sup> )             | 0.636                                                             |
| F(000)                            | 2576                                                              |
| Reflections collected/unique/Rint | 119791 / 11753 / 0.1006                                           |
| Data/parameters                   | 11753 / 878                                                       |
| Final R indices [I>2σ(I)]         | R1 = 0.0503, wR2 = 0.1198                                         |
| R indices all data                | R1 = 0.0667, wR2 = 0.1308                                         |

**Table S2.** Selected torsion angles and angles between planes of **L**.

| <b>Torsion</b>              | <b>Angle (°)</b>  |           |
|-----------------------------|-------------------|-----------|
|                             | <b>A</b>          | <b>B</b>  |
| C2-C1-C7-C12                | -63.0(2)          | -65.6(2)  |
| N1-C14-C15-N2*              | 61(2) / 44(1)     | 33.3(3)   |
| N1-C20-C21-N3               | -100.6(2)         | -88.1(2)  |
| N4-C27-C28-N5               | -104.5(2)         | -105.3(2) |
| N4-C33-C34-N6               | 40.5(2)           | 53.2(2)   |
|                             |                   |           |
| <b>Angle between planes</b> | <b>Angle (°)</b>  |           |
|                             | <b>A</b>          | <b>B</b>  |
| (C1-C6)//C7-C12)            | 60.22(6)          | 63.35(5)  |
| (N2-C19)//(N3-C25)*         | 76.8(2) / 77.9(2) | 64.5(1)   |
| (N5-C32)//(N6-C38)          | 73.48(8)          | 68.42(7)  |

\* Due to the presence of disorder two values have been reported.

### 3. Acid-base properties of the ligand

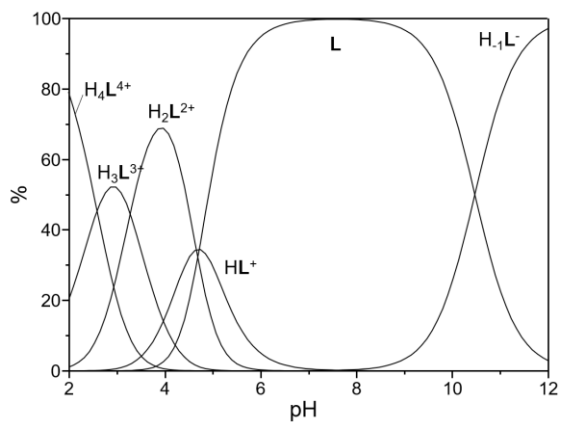

**Figure S7.** Distribution diagram of the species present in solution of **L** ( $[L] = 1 \times 10^{-3}$  M) obtained via potentiometric measurements in  $H_2O/CH_3CN$  80:20 (v/v)  $NMe_4Cl$  0.1 M at  $298 \pm 0.1$  K.

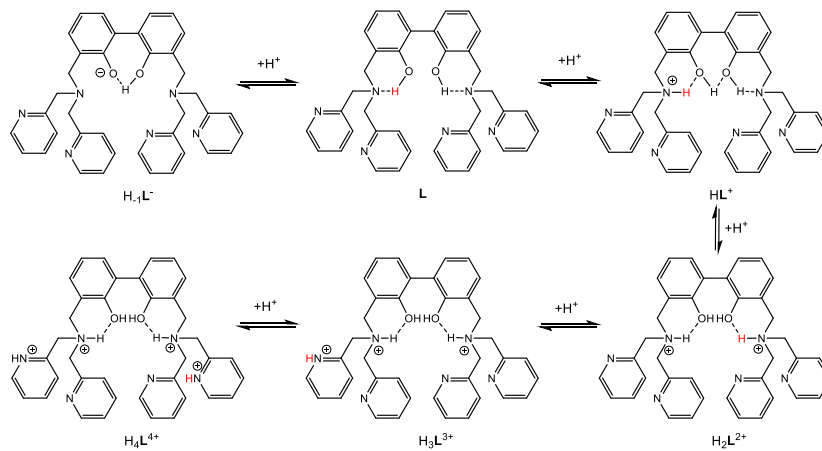

**Figure S8.** Proposed distribution of the acidic hydrogen atoms in the protonated species of **L**.

#### 4. Zn<sup>2+</sup> binding properties.

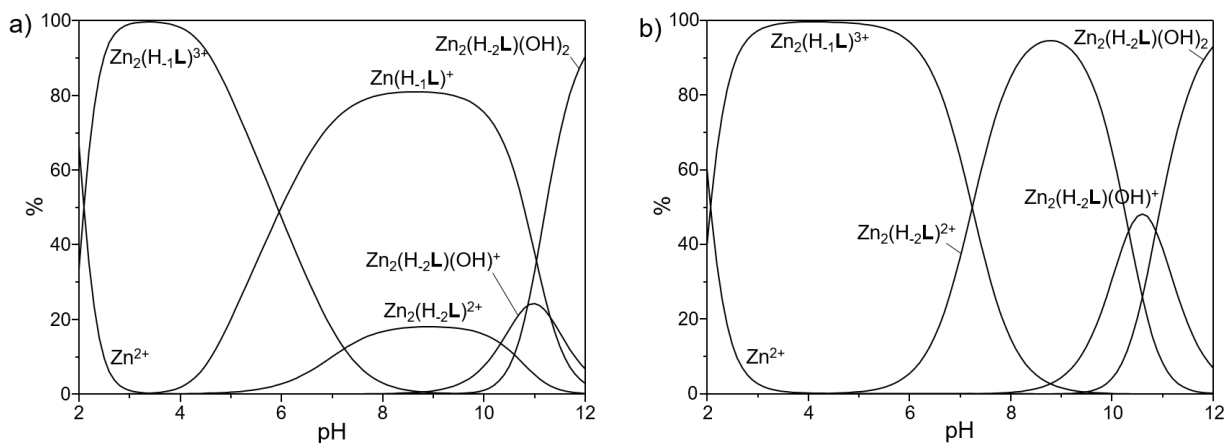

**Figure S9.** Distribution diagrams of the species present in solution for the L/Zn<sup>2+</sup> system in 1:1 (a) and 1:2 (b) molar ratios as a function of pH in aqueous solution ([L] = 1 × 10<sup>-3</sup> M, H<sub>2</sub>O/CH<sub>3</sub>CN 80:20 (v/v) NMe<sub>4</sub>Cl 0.1 M, 298 ± 0.1 K).

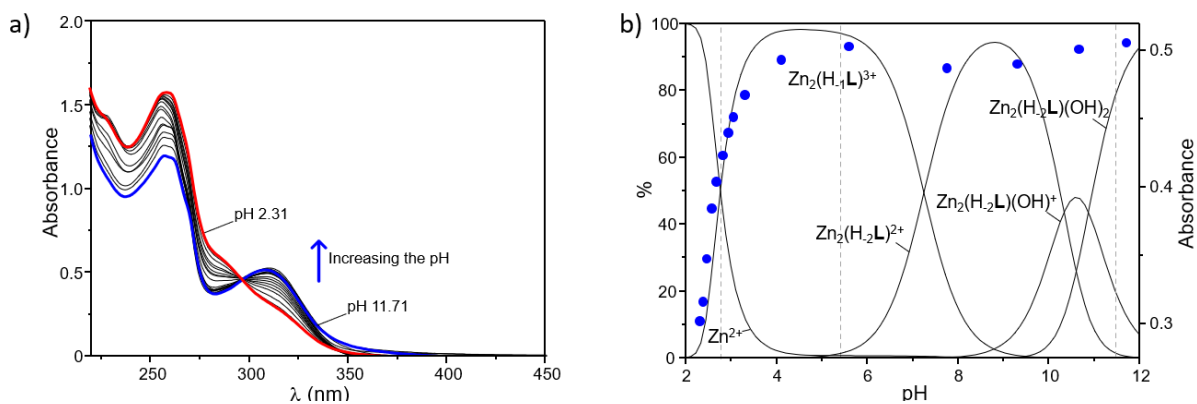

**Figure S10.** a) Absorption spectra registered for a system containing L and Zn<sup>2+</sup> in 1:2 molar ratios at different pH values and b) variation of the absorbance at 313 nm as a function of pH overlapped with the distribution diagram of the species present in solution ([L] = 3.3 × 10<sup>-5</sup> M (a), 1 × 10<sup>-4</sup> M, H<sub>2</sub>O/CH<sub>3</sub>CN 80:20 v/v).

## 5. DFT calculations

**Table S3.** Selected optimized bond distances (Å) and angles (°) for  $\text{Zn}(\text{H}_1\text{L})^+$  (species 1 and 2, differing for the initial placement of  $\text{Zn}^{2+}$  with respect to the BPH oxygen atoms),  $\text{Zn}_2(\text{H}_2\text{L})^{2+}$  and  $\text{Zn}_2(\text{H}_1\text{L})^{3+}$  (species 1 and 2, differing for the presence of an *intra*-BPH H-bond).

|                     | $\text{Zn}(\text{H}_1\text{L})^+_{(1)}$ | $\text{Zn}(\text{H}_1\text{L})^+_{(2)}$ | $\text{Zn}_2(\text{H}_2\text{L})^{2+}$ | $\text{Zn}_2(\text{H}_1\text{L})^{3+}_{(1)}$ | $\text{Zn}_2(\text{H}_1\text{L})^{3+}_{(2)}$ |
|---------------------|-----------------------------------------|-----------------------------------------|----------------------------------------|----------------------------------------------|----------------------------------------------|
| <b>Zn1-O1</b>       | 1.944                                   | 1.936                                   | 1.868                                  | 1.903                                        | 2.149                                        |
| <b>Zn1-O2</b>       | 2.107                                   | 2.169                                   | /                                      | /                                            | /                                            |
| <b>Zn1-N1</b>       | 2.280                                   | <b>2.352</b>                            | 2.030                                  | 2.090                                        | 2.000                                        |
| <b>Zn1-N2</b>       | 2.081                                   | 2.050                                   | 2.097                                  | 2.035                                        | 2.040                                        |
| <b>Zn1-N3</b>       | 2.104                                   | 2.086                                   | 2.044                                  | 2.016                                        | 2.057                                        |
| <b>O1-Zn1-N1</b>    | 86.40                                   | 81.20                                   | 102.08                                 | 101.22                                       | 88.26                                        |
| <b>O1-Zn1-N2</b>    | 94.92                                   | 115.05                                  | 118.29                                 | 124.01                                       | 155.44                                       |
| <b>O1-Zn1-N3</b>    | 153.18                                  | 127.15                                  | 127.18                                 | 121.00                                       | 136.25                                       |
| <b>O1-Zn1-O2</b>    | 85.22                                   | 85.34                                   | /                                      | /                                            | /                                            |
| <b>O2-Zn1-N2</b>    | 136.68                                  | 123.14                                  | /                                      | /                                            | /                                            |
| <b>O2-Zn1-N3</b>    | 92.21                                   | 95.07                                   | /                                      | /                                            | /                                            |
| <b>O2-Zn1-N1</b>    | 140.51                                  | 156.69                                  | /                                      | /                                            | /                                            |
| <b>N1-Zn1-N2</b>    | 82.47                                   | 79.98                                   | 85.72                                  | 84.79                                        | 82.30                                        |
| <b>N1-Zn1-N3</b>    | 78.69                                   | 78.37                                   | 84.24                                  | 114.89                                       | 79.42                                        |
| <b>N2-Zn1-N3</b>    | 104.94                                  | 108.53                                  | 114.45                                 | 86.47                                        | 64.06                                        |
| <b>Zn2-O1</b>       | /                                       | /                                       | /                                      | /                                            | /                                            |
| <b>Zn2-O2</b>       | /                                       | /                                       | 1.874                                  | 2.003                                        | <b>2.651</b>                                 |
| <b>Zn2-N4</b>       | /                                       | /                                       | 2.095                                  | 2.055                                        | 1.993                                        |
| <b>Zn2-N5</b>       | /                                       | /                                       | 2.030                                  | 1.998                                        | 2.050                                        |
| <b>Zn2-N6</b>       | /                                       | /                                       | 2.045                                  | 1.994                                        | 2.057                                        |
| <b>O2-Zn2-N4</b>    | /                                       | /                                       | 102.38                                 | 97.96                                        | 80.37                                        |
| <b>O2-Zn2-N5</b>    | /                                       | /                                       | 119.54                                 | 121.91                                       | 155.74                                       |
| <b>O2-Zn2-N6</b>    | /                                       | /                                       | 126.01                                 | 114.73                                       | 65.10                                        |
| <b>N4-Zn2-N5</b>    | /                                       | /                                       | 85.78                                  | 87.01                                        | 77.13                                        |
| <b>N4-Zn2-N6</b>    | /                                       | /                                       | 84.31                                  | 88.06                                        | 84.22                                        |
| <b>N5-Zn2-N6</b>    | /                                       | /                                       | 114.33                                 | 123.29                                       | 103.39                                       |
| <b>C2-C1-C7-C12</b> | 50.11                                   | 51.80                                   | -44.78                                 | -51.11                                       | 47.90                                        |
| <b>O1---O2</b>      | 2.745                                   | 2.787                                   | 4.771                                  | 4.637                                        | 2.610                                        |



**Table S4.** Intramolecular hydrogen bonds and angles between mean planes containing aromatic BPH rings.

|                       | <b>L</b>           | <b>H<sub>1</sub>L<sup>-</sup></b> | <b>Zn(H<sub>1</sub>L)<sup>+(1)</sup></b> | <b>Zn(H<sub>1</sub>L)<sup>+(2)</sup></b> | <b>Zn<sub>2</sub>(H<sub>2</sub>L)<sup>2+</sup></b> | <b>Zn<sub>2</sub>(H<sub>1</sub>L)<sup>3+(1)</sup></b> | <b>Zn<sub>2</sub>(H<sub>1</sub>L)<sup>3+(2)</sup></b> |
|-----------------------|--------------------|-----------------------------------|------------------------------------------|------------------------------------------|----------------------------------------------------|-------------------------------------------------------|-------------------------------------------------------|
| <b>D-H...A</b>        | <b>O2-H2o...N4</b> | <b>O2-H2o...O1</b>                | <b>O2-H2o...N6</b>                       | <b>O2-H2o...N4</b>                       | /                                                  | /                                                     | <b>O2-H2o...O1<sup>-</sup></b>                        |
| <b>H...A (Å)</b>      | 1.856              | 1.291                             | 1.568                                    | 1.664                                    | /                                                  | /                                                     | 1.763                                                 |
| <b>D...A (Å)</b>      | 2.738              | 2.409                             | 2.613                                    | 2.619                                    | /                                                  | /                                                     | 2.610                                                 |
| <b>D-H...A (°)</b>    | 144.70             | 167.01                            | 168.62                                   | 150.56                                   | /                                                  | /                                                     | 145.27                                                |
| <b>BPH angles (°)</b> | 62.68              | 34.29                             | 49.56                                    | 51.17                                    | 45.33                                              | 51.34                                                 | 45.11                                                 |
